# Supplementary material for: Estimating global ammonia (NH 3 ) emissions based on IASI observations from 2008 to 2018
Source: Copernicus journal article supplement (doi:10.5194/acp-22-10375-2022), 2022-08-12
Supplement: Supplementary file 1 [file acp-22-10375-2022-supplement.pdf]

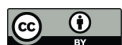

*Supplement of*

## **Estimating global ammonia (NH<sub>3</sub>) emissions based on IASI observations from 2008 to 2018**

**Zhenqi Luo et al.**

*Correspondence to:* Yuzhong Zhang (zhangyuzhong@westlake.edu.cn) and Zhenqi Luo (zl725@cornell.edu)

The copyright of individual parts of the supplement might differ from the article licence.

1 **Table S1.** Consistency evaluation of simulated NH<sub>3</sub> concentrations against IASI observations using full-chemistry  
 2 simulations driven by different emission datasets (BUE1 and TDE) in 2008, 2013 and 2018.

| Year | Number of grids | Percentage of grids | Emission | R <sup>2</sup> | RMSE <sup>a</sup> | FB    |
|------|-----------------|---------------------|----------|----------------|-------------------|-------|
| 2008 | 9971            | 60 %                | TDE      | 0.32           | 12.44             | 0.18  |
|      |                 |                     | BUE1     | 0.40           | 7.83              | -0.30 |
| 2013 | 8957            | 54 %                | TDE      | 0.54           | 7.34              | 0.08  |
|      |                 |                     | BUE1     | 0.37           | 8.02              | -0.19 |
| 2018 | 8599            | 52 %                | TDE      | 0.62           | 8.12              | 0.05  |
|      |                 |                     | BUE1     | 0.31           | 10.55             | -0.32 |

3 <sup>a</sup>In 10<sup>-5</sup> mol m<sup>-2</sup>.

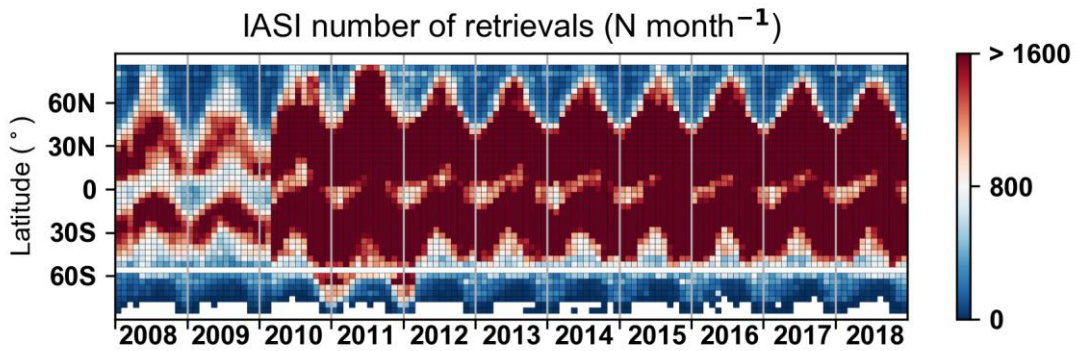

4  
 5 **Figure S1.** Number of satellite retrievals by latitude and by month during 2008-2018.

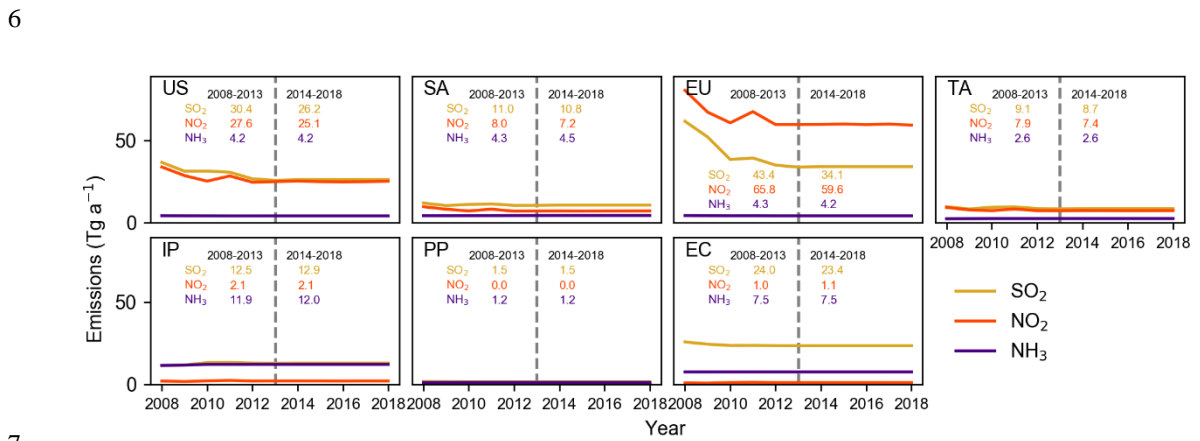

7  
 8 **Figure S2.** Annual anthropogenic emissions of NH<sub>3</sub>, NO<sub>2</sub> and SO<sub>2</sub> from BUE1 for the seven selected regions  
 9 between 2008-2018. Average annual emissions (Tg a<sup>-1</sup>) for 2008-2013 and 2014-2018 are inset.

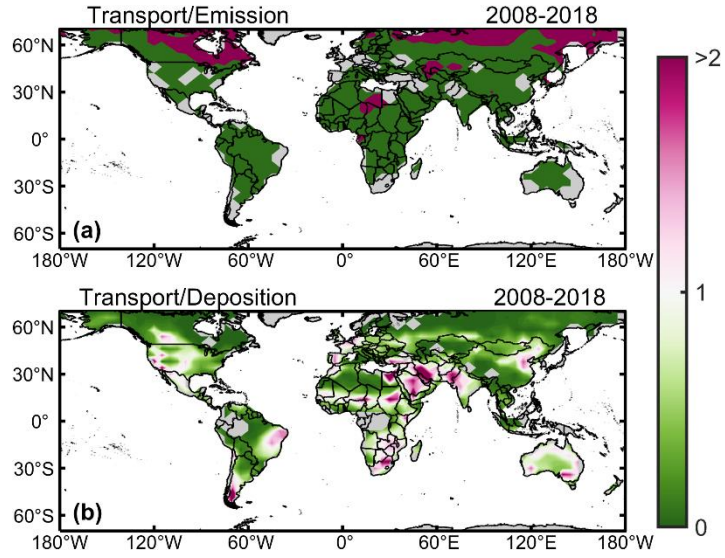

10  
11  
12

**Figure S3.** Spatial distribution of (a) positive transport to emission and (b) negative transport to deposition ratios during 2008-2018.

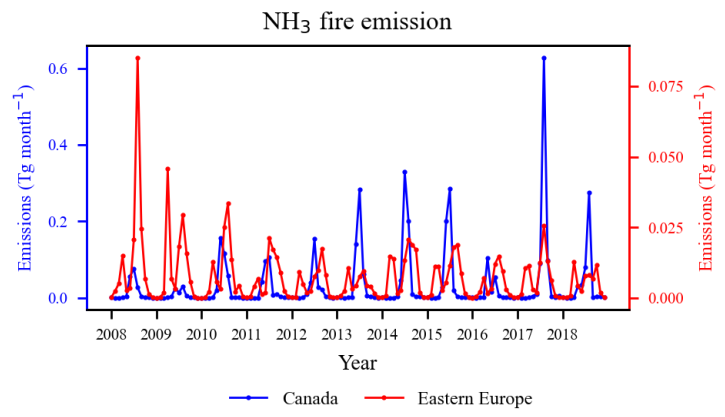

13  
14  
15

**Figure S4.** Monthly average of  $\text{NH}_3$  fire emission over Canada ( $130^\circ - 50^\circ\text{W}$ ,  $48^\circ - 84^\circ\text{N}$ ) and eastern Europe ( $10^\circ - 55^\circ\text{E}$ ,  $36^\circ - 72^\circ\text{N}$ ) during 2008-2018. The emission data is from GFED4.

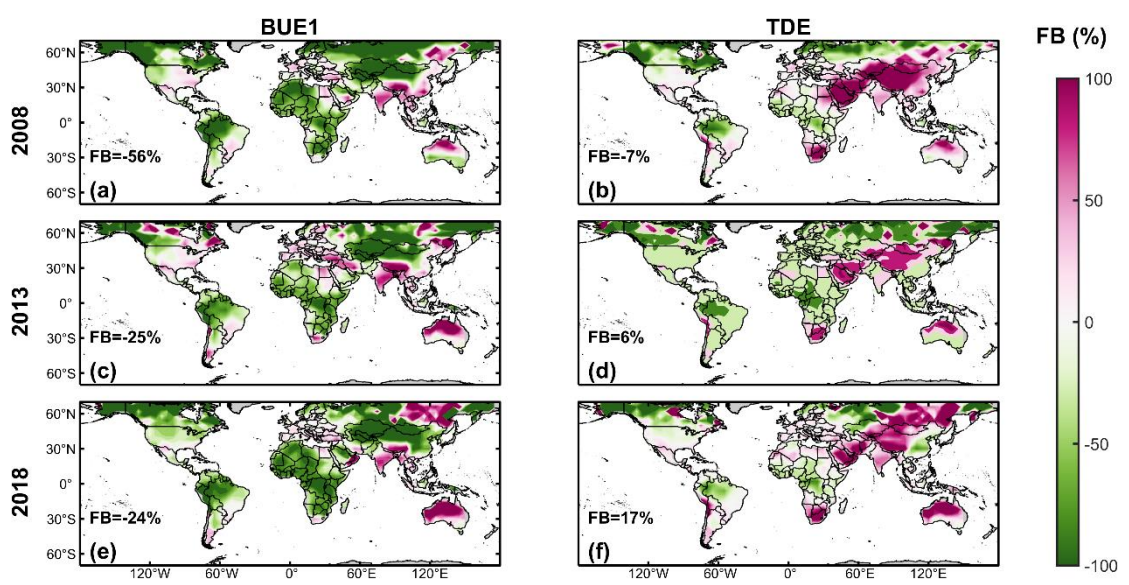

16

17 **Figure S5.** Fractional biases (FBs) of simulated NH<sub>3</sub> column densities from GEOS-Chem simulations driven by (a,  
18 c, e) BUE1 and (b, d, f) TDE for the year (a-b) 2008, (d-e) 2013 and (g-h) 2018, against IASI observations. Global  
19 average FBs (%) for each year are inset.

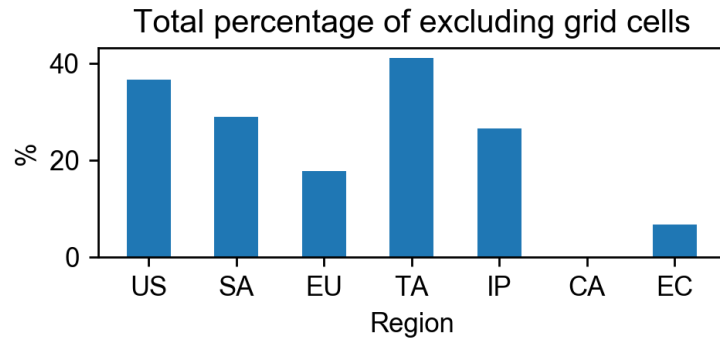

20

21 **Figure S6.** Total percentages of excluding grid cells for seven selected regions between 2008-2018.

22
